# Supplementary material for: The impaired redox status and activated nuclear factor-erythroid 2-related factor 2/antioxidant response element pathway in wooden breast myopathy in broiler chickens
Source: PubMed Central journal article supplement (PMC7961296; doi:10.5713/ajas.19.0953), 2020-04-13
Supplement: ajas-19-0953-suppl.pdf [file ajas-19-0953-suppl.pdf]

## The impaired redox status and activated Nrf2/ARE pathway in wooden breast myopathy

Xiaona Pan, Lin Zhang, Tong Xing, Jiaolong Li and Feng Gao\*

**Supplementary Table S1** The composition and nutrient levels of the basal diets.

| Items                          | 1 to 21 d | 22 to 42 d |
|--------------------------------|-----------|------------|
| Ingredients (%)                |           |            |
| Corn                           | 57.61     | 62.27      |
| Soybean meal                   | 31.00     | 23.00      |
| Corn gluten meal <sup>1</sup>  | 3.29      | 6.00       |
| Soybean oil                    | 3.11      | 4.00       |
| Limestone                      | 1.20      | 1.20       |
| Dicalcium phosphate            | 2.00      | 2.00       |
| L-Lysine                       | 0.34      | 0.35       |
| DL-Methionine                  | 0.15      | 0.08       |
| Salt                           | 0.30      | 0.30       |
| Premix <sup>1</sup>            | 1.00      | 1.00       |
| Calculated nutrient levels     |           |            |
| ME (MJ/kg) <sup>2</sup>        | 12.56     | 13.19      |
| Crude protein (%) <sup>3</sup> | 21.10     | 19.60      |
| Calcium (%)                    | 1.00      | 0.95       |
| Available phosphorus (%)       | 0.46      | 0.39       |
| Lysine (%)                     | 1.20      | 1.05       |
| Methionine (%)                 | 0.50      | 0.42       |
| Methionine + cysteine (%)      | 0.85      | 0.76       |

\* and \*\* show significant difference ( $P < 0.05$ ) and highly significant difference ( $P < 0.01$ ) compared with the NOR group respectively.

<sup>1</sup> Premix provided per kilogram of diet: retinyl acetate for vitamin A, 12000 IU; cholecalciferol for vitamin D<sub>3</sub>, 2500 IU; DL- $\alpha$ -tocopheryl acetate for vitamin E, 20 IU; menadione sodium bisulphate, 1.3

mg; thiamin, 2.2 mg; riboflavin, 8.0 mg; nicotinamide, 40 mg; choline chloride, 400 mg; calcium pantothenate, 10 mg; pyridoxine HCl, 4 mg; biotin, 0.04 mg; folic acid, 1 mg; vitamin B12 (cobalamin), 0.013 mg; Fe (from ferrous sulfate), 80 mg; Cu (from copper sulphate), 8.0 mg; Mn (from manganese sulphate), 110 mg; Zn (from zinc sulfate), 60 mg; I (from calcium iodate), 1.1 mg; Se (from sodium selenite), 0.3 mg

<sup>2</sup> ME = metabolizable energy.

<sup>3</sup> Crude protein content was 60%.
